# Supplementary material for: Implementation of the interacting quantum atom energy decomposition using the CASPT2 method
Source: Royal Society of Chemistry journal article supplement (doi:10.1039/d1cp02837e), 2021-01-01
Supplement: d1cp02837e1.pdf [file d1cp02837e1.pdf]

Physical Chemistry Chemical Physics

# Electronic Supplementary Information

## Implementation of the interacting quantum atoms energy decomposition with the CASPT2 method

Jesús Jara-Cortés,<sup>a</sup> Edith Leal-Sánchez,<sup>b</sup> Evelio Francisco<sup>c</sup>,  
José A. Pérez-Pimienta,<sup>a</sup> Ángel Martín Pendás<sup>c</sup>, Jesús Hernández-Trujillo<sup>b</sup>

<sup>a</sup> Unidad Académica de Ciencias Básicas e Ingenierías, Universidad Autónoma de Nayarit, Tepic 63155, Mexico.

<sup>b</sup> Departamento de Física y Química Teórica, Facultad de Química, UNAM, Mexico City 04510, Mexico.

<sup>c</sup> Departamento de Química Física y Analítica, Facultad de Química, Universidad de Oviedo, Oviedo 33006, Spain.

**Table S 1:** Structural and spectroscopic parameters for the noble gas complexes.  $R_e$  and  $E_{bind}$  respectively correspond to the equilibrium geometry and binding energy, whereas  $E_f$  refers to the energy difference between the excited and ground states at the equilibrium geometry of the excited one. Values are given in eV and distances in Å.

|                 | Ground state ( $1^1\Sigma_g^+$ or $1^2\Sigma_g^+$ ) |                    |            |                    | Excited complex ( $1^1\Sigma_u^+$ or $2^2\Sigma_u^+$ ) |                    |            |                    | $E_f$  |                     |
|-----------------|-----------------------------------------------------|--------------------|------------|--------------------|--------------------------------------------------------|--------------------|------------|--------------------|--------|---------------------|
|                 | $R_e$                                               |                    | $E_{bind}$ |                    | $R_e$                                                  |                    | $E_{bind}$ |                    |        |                     |
|                 | Calc.                                               | Others             | Calc.      | Others             | Calc.                                                  | Others             | Calc.      | Others             | Calc.  | Others              |
| He <sub>2</sub> | 3.102                                               | 2.970              | 0.002      | 0.001              | 1.011                                                  | 1.041              | 2.536      | 2.455              | 15.009 | 18.260              |
| Ne <sub>2</sub> | 2.971                                               | 3.150              | 0.007      | 0.002              | 1.881                                                  | 1.760 <sup>d</sup> | 0.889      | 0.626 <sup>a</sup> | 17.485 | 16.663              |
| Ar <sub>2</sub> | 3.908                                               | 3.758              | 0.012      | 0.011              | 2.501                                                  | 2.825              | 0.629      | 0.621 <sup>b</sup> | 11.064 | 11.455              |
| Kr <sub>2</sub> | 4.177                                               | 4.030              | 0.014      | 0.016              | 2.783                                                  | 2.772 <sup>c</sup> | 0.614      | 0.598 <sup>d</sup> | 9.622  | 9.886               |
| Xe <sub>2</sub> | 3.730                                               | 4.361              | 0.610      | 0.023              | 3.058                                                  | 2.850 <sup>e</sup> | 1.355      | 0.709 <sup>e</sup> | 7.431  | 7.290               |
| HeNe            | 3.137                                               | 3.035 <sup>f</sup> | 0.002      | 0.002 <sup>f</sup> | 1.370                                                  | –                  | 0.912      | –                  | 16.063 | –                   |
|                 |                                                     |                    |            |                    | 4.165                                                  | –                  | 0.047      | –                  | 21.764 | –                   |
| HeF             | –                                                   | – <sup>g</sup>     | –          | b– <sup>g</sup>    | 1.658                                                  | 1.058 <sup>h</sup> | 6.163      | 1.670 <sup>h</sup> | 13.518 | 9.820 <sup>h</sup>  |
| NeF             | 3.127                                               | 2.960 <sup>i</sup> | 0.001      | 0.005 <sup>i</sup> | 2.000                                                  | 2.010 <sup>j</sup> | 5.312      | 6.380 <sup>j</sup> | 10.564 | 10.840 <sup>j</sup> |
| ArF             | 3.183                                               | 3.190 <sup>i</sup> | 0.077      | 0.010 <sup>i</sup> | 2.331                                                  | 2.400 <sup>j</sup> | 4.778      | 5.520 <sup>j</sup> | 6.460  | 6.490 <sup>j</sup>  |
| KrF             | 3.328                                               | 3.120 <sup>k</sup> | 0.012      | 0.017 <sup>k</sup> | 2.456                                                  | 2.530 <sup>j</sup> | 4.455      | 5.360 <sup>j</sup> | 5.016  | 5.270 <sup>j</sup>  |
| XeF             | 2.751                                               | 2.360 <sup>k</sup> | 0.208      | 0.112 <sup>k</sup> | 2.486                                                  | 2.720 <sup>j</sup> | 4.195      | 5.120 <sup>j</sup> | 3.860  | 4.030 <sup>j</sup>  |

Unless otherwise indicated, the data in columns “Others” were obtained from reference [1]. <sup>a</sup> MCSCF/5s3p [2]. <sup>b</sup> MCSCF/PP-4s4p3d [3]. <sup>c</sup> CIPSI/5s5p3df [4]. <sup>d</sup> Ref. [5]. <sup>e</sup> Estimated using experimental data [6]. <sup>f</sup> CCSD(T)/cc-pV5Z [7]. <sup>g</sup>. Not bonded according to MRCI-SD+Q/d-aug-cc-pVQZ[8]. <sup>h</sup> MRCI-D/aug-cc-pVDZ [9]; the state  $2^2\Sigma_u^+$  does not dissociate at the correct limit. <sup>i</sup> CCSD(T)/AVTZ [10]. <sup>j</sup> CI /D95V [11]. <sup>k</sup> MR-ACPF/STUT-AVTZ [10].

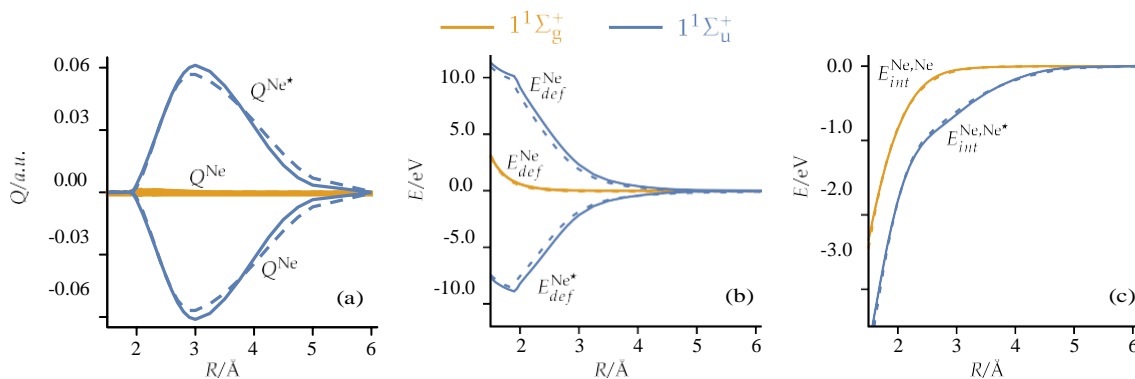

**Fig. S1:** (a) Atomic charges, (b) deformation and (c) interaction energies as a function of the inter-nuclear distance for the electronic  $1^1\Sigma_g^+$  and  $1^1\Sigma_u^+$  states of Ne<sub>2</sub>. The data of the solid and dashed lines respectively correspond to the aug-cc-pVDZ and aug-cc-pVTZ basis sets. Ne\* denotes the excited atom at the dissociation limit.

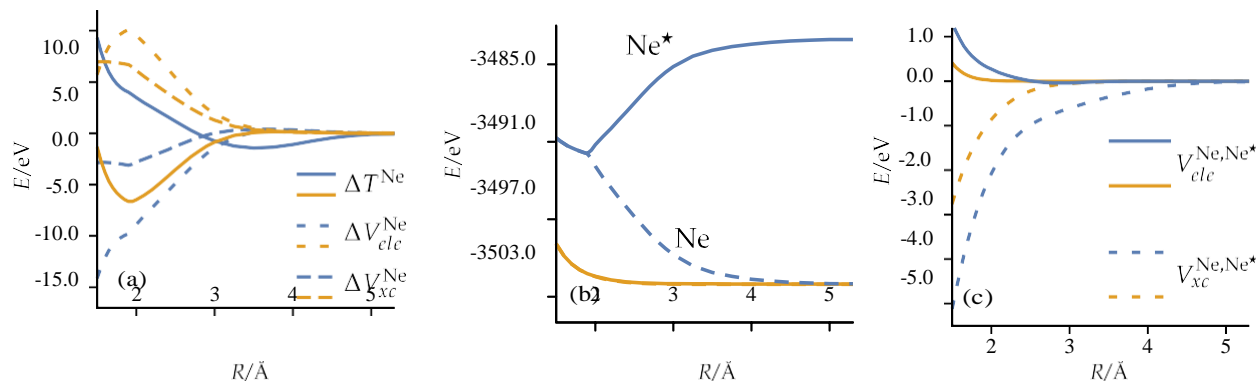

**Fig. S2:** a) Changes on the atomic components (e.g.  $\Delta T^{\text{He}} = T^{\text{He}} - T^{\text{He}}_{R \rightarrow \infty}$ ) as a function of the internuclear distance for the  $1^1\Sigma_u^+$  state of  $\text{Ne}_2$ ; the yellow and blue colors correspond respectively to the Neon atoms that dissociate in a ground or excited state. b) Self-energies of neon atoms for the  $1^1\Sigma_g^+$  and  $1^1\Sigma_u^+$  states. c) Contributions of the interaction energy.  $\text{Ne}^*$  denotes the excited atom at the dissociation limit.

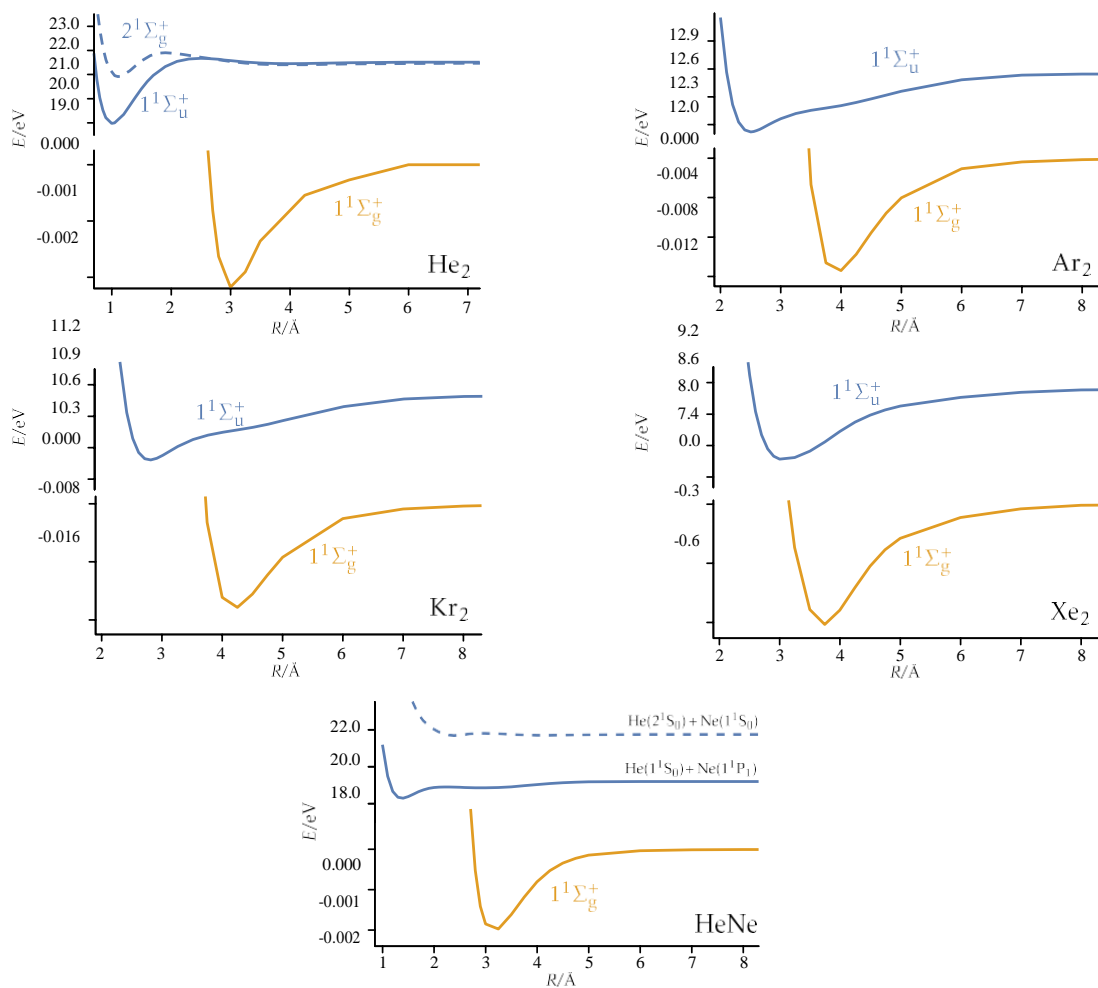

**Fig. S3:** Potential energy curves for low-energy singlet states of noble gas complexes.

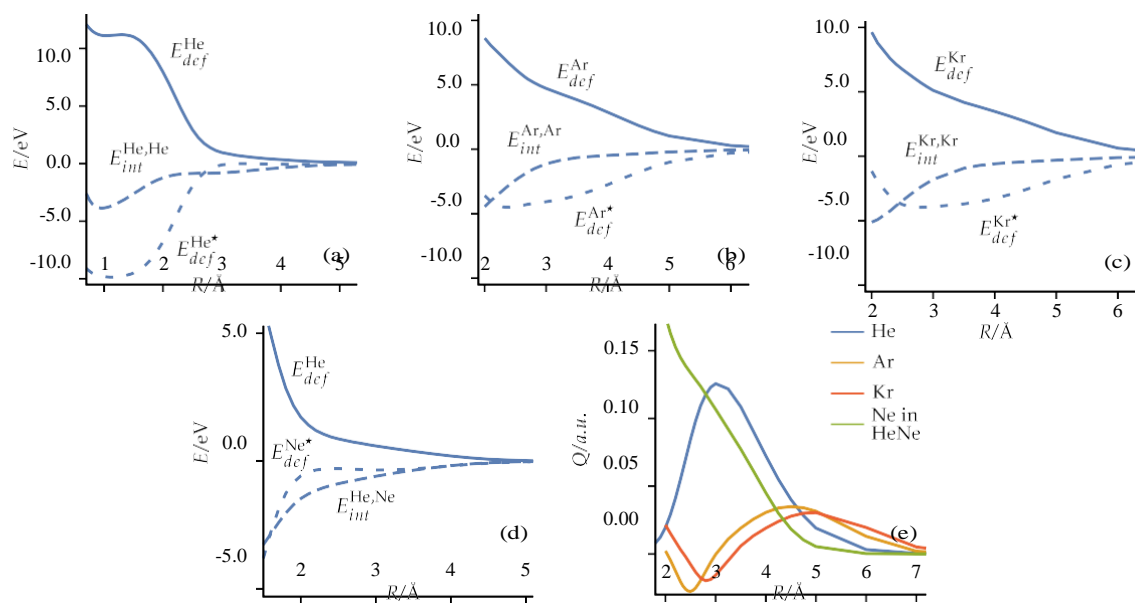

**Fig. S4:** Deformation and interaction energies as a function of the internuclear distance for the  $1^1\Sigma^+$  state of He<sub>2</sub> (a), Ar<sub>2</sub> (b), Kr<sub>2</sub> (c) and HeNe (d). e) Atomic charge of the excited atom for the Noble gases complexes.

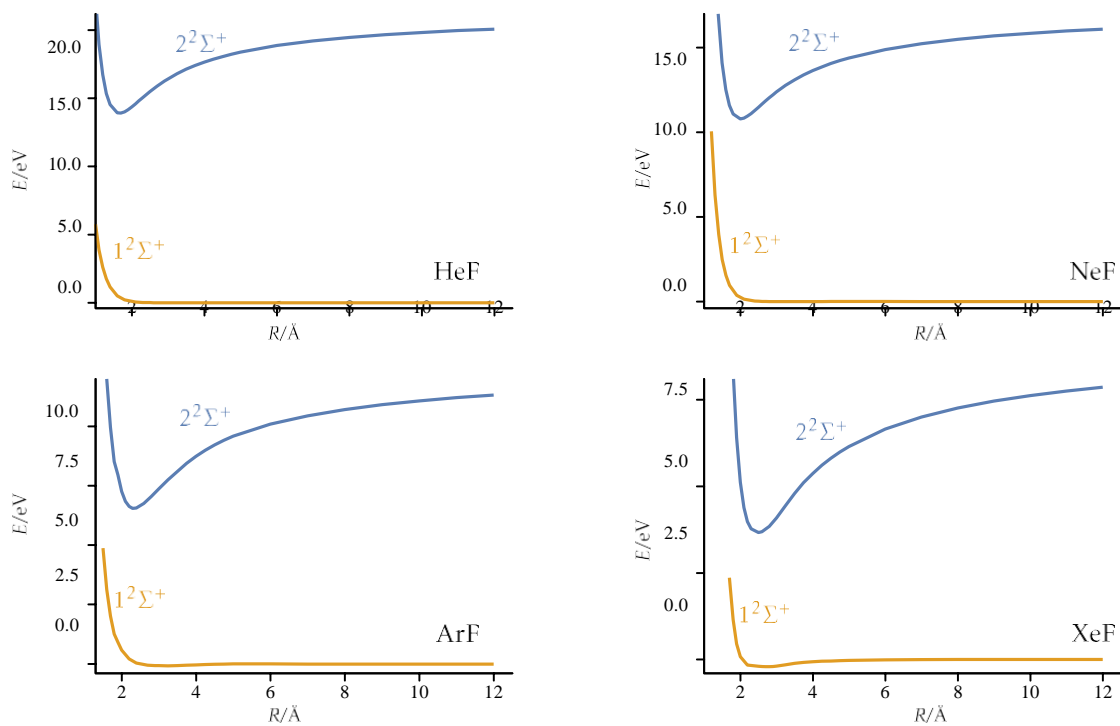

**Fig. S5:** Potential energy curves for low-energy singlet states of RgF complexes.

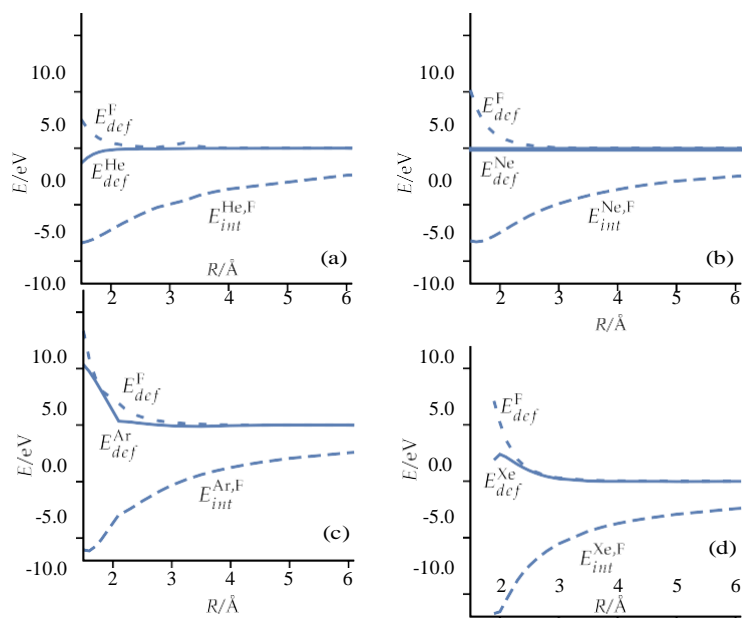

**Fig. S6:** Deformation and interaction energies as a function of the internuclear distance for the  $2^2\Sigma^+$  state of HeF (a), NeF (b), ArF (c) and XeF (d).

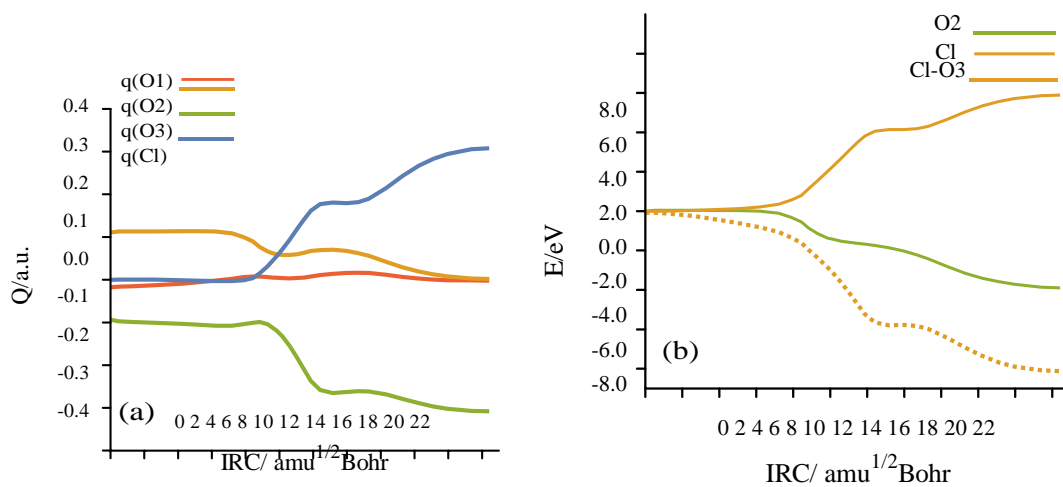

**Fig. S7:** (a) Atomic charges (b)  $V_{xc}$  contribution to  $E_{self}^{Cl}$ ,  $E_{self}^{O3}$ ,  $E_{inter}^{Cl,O3}$  along the intrinsic reaction coordinate for the  $Cl + O_3 \rightarrow ClO + O_2$  process.

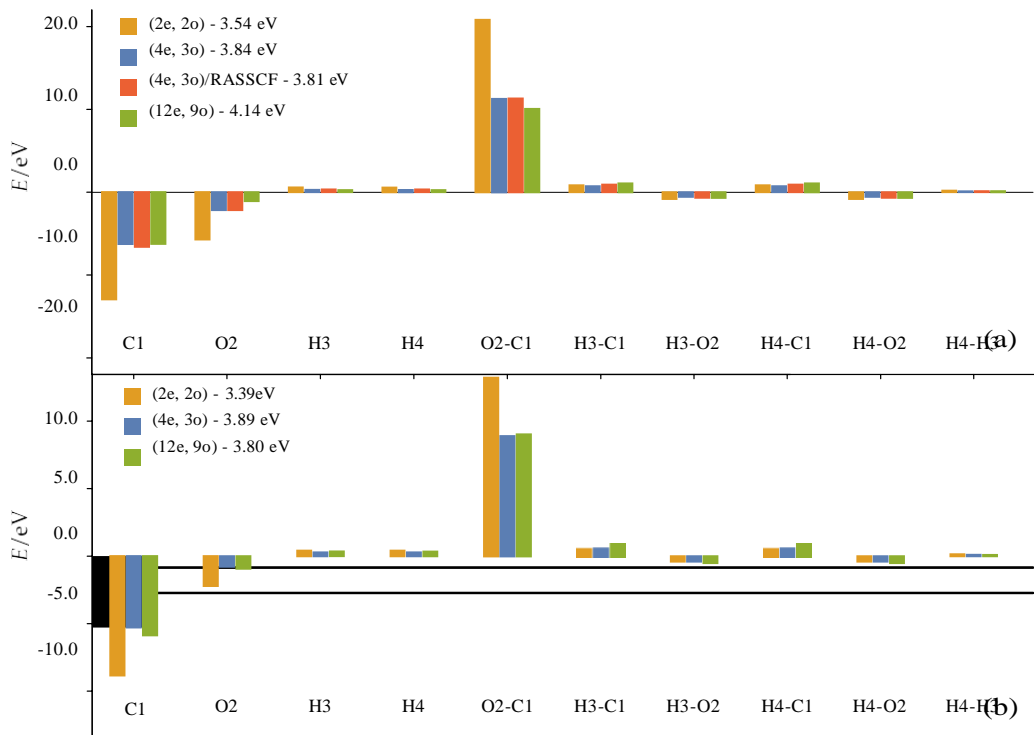

**Fig. S8:** Differences in self-energies and interaction terms between the  $S_0$  and  ${}^1n\pi^*$  states of  $H_2CO$  at the equilibrium geometry of  $S_0$ : (a) IQA/CASSCF and (b) IQA/CASPT2 decompositions as a function of the size of active space. The RASSCF space correlates all the electrons of the systems, with two holes for RAS1, (4e, 3o) for RAS2 and zero electrons in RAS3.

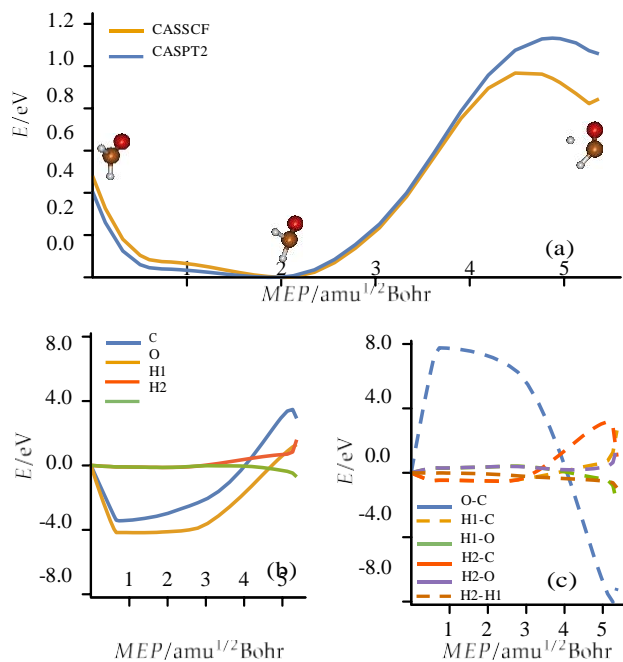

**Fig. S9:** (a) Minimum energy path of  ${}^1n\pi^*$  state for  $H_2CO$  evaluated at the CASPT2 level of theory; the yellow line corresponds to single point CASSCF (12e,9o) calculations along the MEP. In both cases, the energies are presented relative to the minimum of  ${}^1n\pi^*$ . Changes on the b) self-energies and c) interaction terms for the  ${}^1n\pi^*$  state along the MEP. The data in b and c take as reference the value at the starting point, and correspond to the CASSCF calculations. For CASPT2 see the figure 5 in the manuscript.

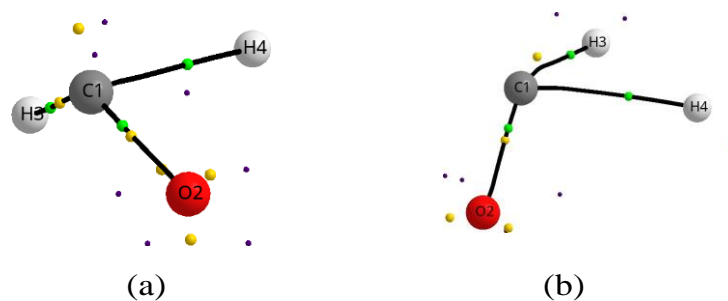

**Fig. S10:** Critical points (3,+3) and (3,-1) of the laplacian of the electron density for  $\text{H}_2\text{CO}$  at the structure associated with the conical intersection of the MEP (see fig. 5a). a) Ground state, b) first singlet excited state.

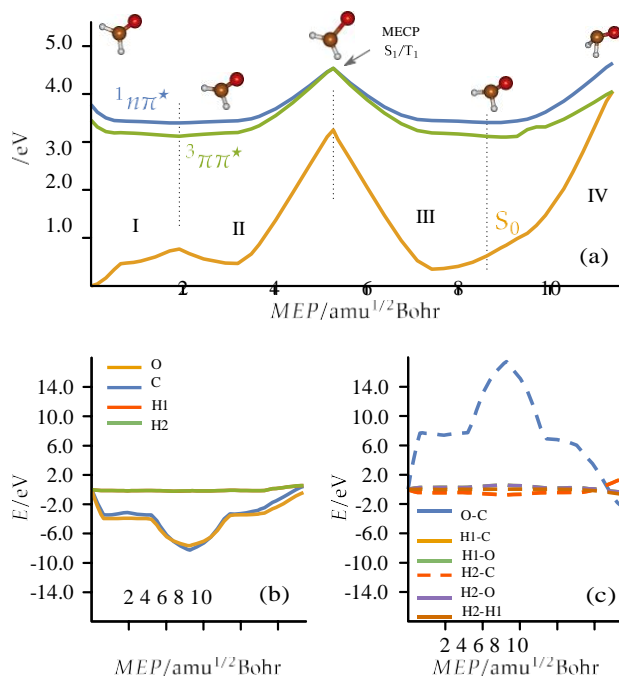

**Fig. S 11:** a) Energies of the low-lying states of  $\text{H}_2\text{CO}$  along the minimum energy path (MEP) of  ${}^1n\pi^* \rightarrow {}^3\pi\pi^*$ . Changes on the b) self-energies and c) interaction terms for the excited state along the MEP. The data in b and c take as reference the value at the starting point, and also, correspond to  ${}^1n\pi^*$  before the MECP and  ${}^3\pi\pi^*$  after the MECP.

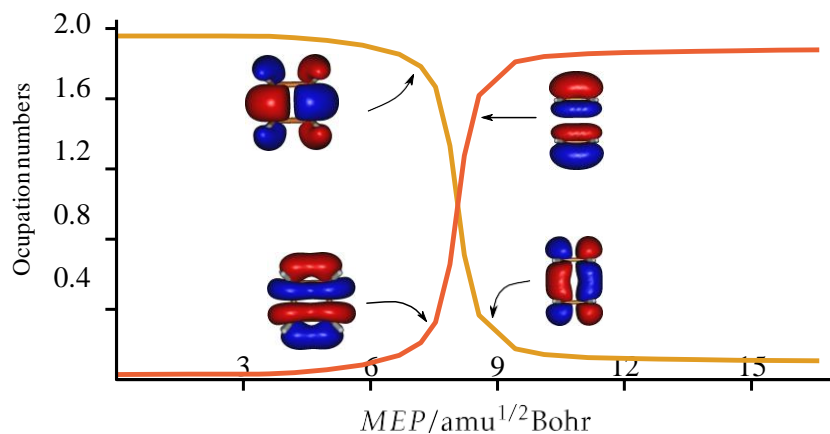

**Fig. S12:** Occupation numbers of relevant molecular orbitals of  $\text{C}_4\text{H}_8$  along the intrinsic reaction coordinate for the ground state concerted dissociation.

## References

- [1] K. P. Huber y G. Herzberg, *Molecular Spectra and Molecular Structure: IV. Constants of Diatomic Molecules*, Springer (1979).
- [2] S. Iwata, "Potential energy curves of several excited states of the  $ne_2^*$  excimer: Assignment of the transient absorption spectra of the excimer", *Chem. Phys.* **37**(2), p. 251–257 (1979).
- [3] F. Spiegelmann y J.-P. Malrieu, "Theoretical calculation of the excited states of the  $ar_2$  dimer", *Chem. Phys. Lett.* **57**(2), p. 214–219 (1978).
- [4] E. Audouard y F. Spiegelmann, "Theoretical study of the excited states of the  $Kr_2^x$  excimer: Potential curves including ab initio spin-orbit coupling", *J. Chem. Phys.* **94**(9), p. 6102–6124 (1991).
- [5] R. Sauerbrey, H. Eizenhofer, U. Schaller y H. Langhoff, "Photoexcitation of the rare-gas excimer molecules  $Ne_2^x$ ,  $Ar_2^x$  and  $Kr_2^x$ ", *J. Phys. B-At. Mol. Phys.* **19**(15), p. 2279–2289 (1986).
- [6] R. S. Mulliken, "Potential curves of diatomic rare-gas molecules and their ions, with particular reference to  $Xe_2^+$ ", *J. Chem. Phys.* **52**(10), p. 5170–5180 (1970).
- [7] G. Jabbari, S. Klaiman, Y.-C. Chiang, F. Trinter, T. Jahnke y K. Gokhberg, "Ab initio calculation of icd widths in photoexcited hene", *J. Chem. Phys.* **140**(22), p. 224305 (2014).
- [8] U. Lourderaj y N. Sathyamurthy, "Ab initio potential energy surface for  $hef_2$  in its ground electronic state", *Chem. Phys.* **308**(3), p. 277–284 (2005).
- [9] I. D. Petsalakis, "Electronic structure and lifetime of an excimer state of  $hef^+$ ", *J. Chem. Phys.* **94**(4), p. 2906–2909 (1991).
- [10] G. J. Hoffman y M. Colletto, "An ab initio study of some noble gas monohalides", *J. Chem. Phys.* **114**(5), p. 2219–2227 (2001).
- [11] T. H. Dunning y P. J. Hay, "The covalent and ionic states of the rare gas monofluorides", *J. Chem. Phys.* **69**(1), p. 134–149 (1978).
